# Supplementary material
Source: HighWire-hosted journal article supplement (https://qualitysafety.bmj.com/content/30/8/648)
Supplement: inline-supplementary-material-1 [file inline-supplementary-material-1.pdf]

### **Appendices**

- A. Observation tool used for site visits
- B. Qualitative theme development process
- C. Additional contextual factors: Hospital, skilled nursing facility, and county characteristics

## Appendix A - Observation tool (pg. 1/3)

### Observation Checklist: Hospital

#### Key processes, people & probes to observe:

| Process                                                                                                                                                                                                                                                                                                                                                                                                                                                          | People                                                                                                                                                                                                                                                                                                                                                                       | Probes                                                                                                                                                                                                                                                                                                                                               |
|------------------------------------------------------------------------------------------------------------------------------------------------------------------------------------------------------------------------------------------------------------------------------------------------------------------------------------------------------------------------------------------------------------------------------------------------------------------|------------------------------------------------------------------------------------------------------------------------------------------------------------------------------------------------------------------------------------------------------------------------------------------------------------------------------------------------------------------------------|------------------------------------------------------------------------------------------------------------------------------------------------------------------------------------------------------------------------------------------------------------------------------------------------------------------------------------------------------|
| <b>Decision to send to SNF</b> <ul style="list-style-type: none"> <li><input type="checkbox"/> First discussion of SNF</li> <li><input type="checkbox"/> Team communication</li> <li><input type="checkbox"/> Entering consults</li> <li><input type="checkbox"/> Conducting consults (e.g. SW SNF consult)</li> <li><input type="checkbox"/> Interdisciplinary rounds</li> </ul>                                                                                | <ul style="list-style-type: none"> <li><input type="checkbox"/> Social Work</li> <li><input type="checkbox"/> Medical Provider</li> <li><input type="checkbox"/> PT/OT</li> <li><input type="checkbox"/> Nurses</li> <li><input type="checkbox"/> Discharge planner</li> <li><input type="checkbox"/> Others!</li> </ul>                                                     | <ul style="list-style-type: none"> <li><input type="checkbox"/> What is the need for SNF?</li> <li><input type="checkbox"/> Who brought it up?</li> <li><input type="checkbox"/> How are consults entered?</li> <li><input type="checkbox"/> What happens next? Can I observe?</li> <li><input type="checkbox"/> How do they communicate?</li> </ul> |
| <b>Patient Interactions</b> <ul style="list-style-type: none"> <li><input type="checkbox"/> First discussion of SNF</li> <li><input type="checkbox"/> Consults with medical staff</li> <li><input type="checkbox"/> Patient education &amp; teach-back re: SNF, medications, self-care</li> <li><input type="checkbox"/> SNF selection</li> </ul>                                                                                                                | <ul style="list-style-type: none"> <li><input type="checkbox"/> Social Work</li> <li><input type="checkbox"/> Medical Provider</li> <li><input type="checkbox"/> PT/OT</li> <li><input type="checkbox"/> Nurses</li> <li><input type="checkbox"/> Pharmacist</li> <li><input type="checkbox"/> Others!</li> </ul>                                                            | <ul style="list-style-type: none"> <li><input type="checkbox"/> Do they have templates?</li> <li><input type="checkbox"/> Who does the education?</li> <li><input type="checkbox"/> How is caregiver involved, if at all?</li> </ul>                                                                                                                 |
| <b>Information Transfer Hospital → SNF</b> <ul style="list-style-type: none"> <li><input type="checkbox"/> Orders to SNF</li> <li><input type="checkbox"/> Medication information</li> <li><input type="checkbox"/> SNF patient liaison interactions</li> <li><input type="checkbox"/> Hospital RN to SNF RN hand-off</li> <li><input type="checkbox"/> Hospital MD to SNF RN handoff</li> <li><input type="checkbox"/> Hospital MD to SNF MD handoff</li> </ul> | <ul style="list-style-type: none"> <li><input type="checkbox"/> Social Work</li> <li><input type="checkbox"/> Medical Provider</li> <li><input type="checkbox"/> SNF Nurse</li> <li><input type="checkbox"/> Hospital Nurses</li> <li><input type="checkbox"/> Pharmacist</li> <li><input type="checkbox"/> SNF Liaison</li> <li><input type="checkbox"/> Others!</li> </ul> | <ul style="list-style-type: none"> <li><input type="checkbox"/> How and when are orders sent? Who does that? Template?</li> <li><input type="checkbox"/> How do they send medication?</li> <li><input type="checkbox"/> What kind of information is sent? When?</li> <li><input type="checkbox"/> How do they know what SNF wants?</li> </ul>        |
| <b>Patient Discharge</b> <ul style="list-style-type: none"> <li><input type="checkbox"/> Supplies and medications assembly</li> <li><input type="checkbox"/> Sending supplies and meds</li> <li><input type="checkbox"/> Final assessment before discharge by MD, RN</li> <li><input type="checkbox"/> Patient transport to SNF</li> <li><input type="checkbox"/> Medication information</li> </ul>                                                              | <ul style="list-style-type: none"> <li><input type="checkbox"/> Social Work</li> <li><input type="checkbox"/> Medical Provider</li> <li><input type="checkbox"/> Nurse</li> <li><input type="checkbox"/> Transport person</li> <li><input type="checkbox"/> Front desk person</li> <li><input type="checkbox"/> Others!</li> </ul>                                           | <ul style="list-style-type: none"> <li><input type="checkbox"/> When do they put in orders v. when sent?</li> <li><input type="checkbox"/> How do they know SNF wants/capabilities?</li> <li><input type="checkbox"/> What time is patient transferred?</li> </ul>                                                                                   |

#### Communication Rating: when observing, think about how people are communicating:

- **0**= no communication observed in this domain
- **1**= one-way communication or communication that was not satisfactory for the person receiving the communication to act on the information
- **2** = two-way communication (person receiving information was able to ask questions/asked questions)
- **3** = closed-loop communication (person receiving information not only allowed to ask questions, but person giving communication has checked for their understanding)

#### Remember to note:

- Where you observed
- Who you observed (roles, groups)
- What you observed (environment/activities/dynamics)
- How it felt (how did the communication feel)
- Key quotes or phrases used
- Follow-up questions you have

#### Goals for Observation:

- 1<sup>st</sup> choice:** Follow the hospital team through the discharge process, asking probing questions along the way
- 2<sup>nd</sup> choice:** Ask staff to walk you through the process, e.g. pull up the discharge summary and talk you through it
- 3<sup>rd</sup> choice:** Ask them to tell you about the process and what they do, how they feel about it and what works well/doesn't. Try to get templates of tools/forms they use

#### General probes

- I saw you did \_\_\_, can you tell me more?
- Is the normal?
- How do they feel about process?

## Appendix A - Observation tool (pg. 2/3)

### Observation Notes : Hospital

---

Date \_\_\_\_\_

Unit \_\_\_\_\_

Weekday \_\_\_\_\_

Researcher \_\_\_\_\_

Start time (hh:mm) \_\_\_\_\_

End Time(hh:mm) \_\_\_\_\_

Postcard consent obtained? Yes No

**Artifacts collected** (check if collected)

- ☐ Discharge instructions
- ☐ Checklists for patient d/c
- ☐ Patient's *redacted* hospital record for SNF
- ☐ SNF educational/informational materials
- ☐ Other \_\_\_\_\_

## Appendix A - Observation tool (pg. 3/3)

### Observation Definitions: Hospital

**Discharge planning:**

- Planning for hospital discharge while patient is still being treated in hospital. Includes: collaborating with the outpatient provider and taking patient and caregiver's preferences into account can help ensure optimal outpatient follow-up. *Specifically, how need for SNF is identified/assessed.*

**Advance Care Planning:**

- May begin in the hospital or outpatient setting, involves establishing goals of care, health care proxies, and engaging with palliative care or hospice services, if appropriate.

**Medication Safety:**

- Taking an accurate medication history, reconciling changes throughout the hospitalization and communicating the reconciled medications regimen to patients and providers across transitions of care process.

**Availability, Timeliness, Clarity and Organization of information:**

- Post-discharge providers ability to assess and quickly understand information they have been provided before assuming care of patient.

**Coordination of Care: Rounds and Team Meetings:**

- Rounds, communication with doctors and allied health workers or other nurse(s) regarding care, including on the phone, planning for admission or discharge. Includes debriefing.

**Information Transfer:**

- Verbal or electronic interaction with other departments and/or with other facilities (e.g. hospital/SNF) related to coordination of patient care and discharge/admissions, providing instructions, referencing written resource materials (e.g. textbooks, phone lists, procedure manuals).

**Patient Education:**

- Teaching patients and their caregivers about hospital diagnoses, instructions for self-care, medication changes, appointments, and whom to contact if issues arise. Confirming comprehension instructions through assessments of acute (delirium) and chronic (dementia) cognitive impairments and teach-back from the patient/caregiver, providing patients/caregivers w/ educational materials appropriate for health literacy and preferred language.

**Moving Patient:**

- Escorting patients to another patient care area or department within the hospital/SNF, including discharge. Includes transfer to/ from stretcher/ wheelchair and accompanying a patient to another area for any reason.

**Monitoring and Managing Symptoms After Discharge:**

- Monitoring for new or worsening symptoms; medication side effects, discrepancies, or nonadherence; and other self-management challenges.

**Medication and Medical Supply Preparation:**

- Obtaining and making ready medications, IVs, and other necessary supplies. Includes instructions for use (see: information transfer).

**Appendix B - Qualitative Theme Development Process****Table 2** Thematic phases<sup>23,26,48</sup> aligned with description of study actions

| Phase                       | Analysis Description                                                                                                                                                                                                                                                                                                                                                                                                                                                                                                                                                                                                                                                                                                                                                                                                                                             |
|-----------------------------|------------------------------------------------------------------------------------------------------------------------------------------------------------------------------------------------------------------------------------------------------------------------------------------------------------------------------------------------------------------------------------------------------------------------------------------------------------------------------------------------------------------------------------------------------------------------------------------------------------------------------------------------------------------------------------------------------------------------------------------------------------------------------------------------------------------------------------------------------------------|
| <b>Data Familiarization</b> | <ul style="list-style-type: none"> <li>To strengthen credibility, we included a research team with diverse backgrounds (e.g., hospitalist, nurse, public health, anthropologist, qualitative researchers, quality improvement experts) in analysis.</li> <li>We triangulated and organized data by hospital-SNF sites in Atlas.ti.</li> <li>Although we <i>a priori</i> expected to identify coordinating behaviors (based on the Ideal Transition in Care Framework),<sup>22</sup> data familiarization focused on describing the process as observed in practice.</li> <li>Three qualitative researchers performed initial rounds of open-coding and memo-ing to capture “process” and “context.”</li> <li>Flow-maps were used to organized data and identify common patterns of transitional processes for the hospital-SNF transfer at each site.</li> </ul> |
| <b>Code Generation</b>      | <ul style="list-style-type: none"> <li>Initial list of open-codes and raw data examples were shared and discussed with team during code generation.</li> <li>The team kept an audit trail and reflexivity journals about research, methodological decisions, and thematic development.</li> <li>Through an iterative team process a unifying flow-map was developed.</li> <li>Based on the initially developed list of data elements we created five major categories describing the process of preparing hospitalized patients for SNFs.</li> </ul>                                                                                                                                                                                                                                                                                                             |
| <b>Theme Refinement</b>     | <ul style="list-style-type: none"> <li>Themes continued to be refined through memo-ing, coding extracts/entire data set, and diagraming codes with thematic mapping.</li> <li>Based on the open-coding and the Ideal Transition in Care Framework<sup>22</sup> (which informed the development of the observation tool) we identified a list of all potential sub-processes.</li> <li>Regular individual debrief sessions were held with key team members to review representative examples and key memos to provide peer examination over methods, emerging themes, and developing conclusions.</li> </ul>                                                                                                                                                                                                                                                      |
| <b>Theme Identification</b> | <ul style="list-style-type: none"> <li>The strategic focus for identification was determining processes that were present across all cases, yet also were the major drivers in variations in between the high- and low-performing sites.</li> <li>Based on the flow maps, thematic mapping, and data tables we developed a code hierarchy to collapsing similar codes into themes.</li> <li>A codebook was developed to define and provide illustrative key examples of themes (stages), subthemes (sub-processes), and common overarching patterns driving performance differences.</li> <li>Constant comparison techniques were used to identify support for themes common across sites, as well as the consistently different between performance levels.</li> <li>The process was repeated until no new higher order themes emerged.</li> </ul>              |
| <b>Data Reporting</b>       | <ul style="list-style-type: none"> <li>Focused coding was used to identify representative quotes and examples of themes and subthemes.</li> <li>The manuscript includes short direct quotes to aid in specific points about interpretation and demonstrate prevalence of themes.</li> <li>Processes were compiled into Table 2 and Appendix C to aid in transferability and add merit of the analysis.</li> <li>Standards for Reporting Qualitative Research Guidelines were used to guide write up, as well as enhance transparency and dependability.<sup>17</sup></li> </ul>                                                                                                                                                                                                                                                                                  |

**Appendix C – Additional contextual factors: Hospital, skilled nursing facility, and county characteristics**

Table C1. Description of hospitals factors

| Hospital Contextual Factor                                                           | Hospital A      | Hospital B    | Hospital C         | Hospital D    |
|--------------------------------------------------------------------------------------|-----------------|---------------|--------------------|---------------|
| Hospital performance category*                                                       | Low             | Low           | High               | High          |
| Geographic location                                                                  | East Coast      | South         | West Coast         | Southeast     |
| Urban vs. rural                                                                      | Urban           | Rural         | Urban              | Rural         |
| Ownership type                                                                       | Nonprofit       | Nonprofit     | Governmental/State | Nonprofit     |
| Teaching status                                                                      | Non-teaching    | Teaching      | Teaching           | Non-teaching  |
| Magnet status <sup>†</sup>                                                           | Yes             | No            | Yes                | No            |
| Trauma level                                                                         | I               | III           | I                  | NA            |
| No. of SNFs in 25-mile radius of hospital <sup>‡</sup>                               | 19              | 20            | 47                 | 78            |
| No. of inpatient beds                                                                | 552             | 669           | 617                | 687           |
| No. of total bed days <sup>§</sup> **                                                | 145,373         | 141,191       | 174,804            | 114,933       |
| FTE - Employees on Payroll**                                                         | 4563            | 1927          | 7799               | 2264          |
| Total Unreimbursed & Uncompensated Care**                                            | \$59,226,123    | \$19,739,810  | \$213,043,562      | \$29,220,198  |
| Allowable Disproportionate Share Hospital (DSH) Adjustment Percentage** <sup>a</sup> | 16%             | 10%           | 41%                | 6%            |
| Net patient revenue**                                                                | \$1,095,412,530 | \$354,561,198 | \$1,757,804,442    | \$527,959,853 |
| Net income (or loss)**                                                               | \$108,078,915   | -\$3,776,358  | \$58,299,498       | \$77,336,650  |

*Note: \*Hospital performance category 30-day readmission performance category = Defined using a previously published sample of US Veterans Affairs patients<sup>8</sup>; † Magnet status = Excellence nursing and healthy work environments indicator awarded by the American Nurses Credentialing Center; ‡ Number of Skilled Nursing Facilities (SNFs) in a 25-mile radius of hospital is based on number of SNFs in the hospital zip code as identified using Center for Medicare and Medicaid Services (CMS) nursing home compare tool; \*\*Determined from the [2015 CMS Cost Report File](#); § Total bed days = Total number of patient days (all payors); <sup>†</sup>FTE Employees on Payroll is the average number of full-time equivalent employees per year; <sup>a</sup> Allowable Disproportionate Share Hospital (DSH) Adjustment Percentage = defined as the number of Medicare SSI inpatient days from total Medicare inpatient days plus the number of Medicaid, non-Medicare inpatient days from total inpatient days. Indicator of being a safety net hospital, with higher percentage reflecting higher Medicare and Medicaid inpatient caseloads.*

Table C2. Description of county demographics for each hospital from the US Census Community Survey

| County Contextual Factor                                 | County A    | County B    | County C    | County D    |
|----------------------------------------------------------|-------------|-------------|-------------|-------------|
| Hospital ID                                              | Hospital A  | Hospital B  | Hospital C  | Hospital D  |
| Hospital performance category                            | Low         | Low         | High        | High        |
| Geographic location                                      | East Coast  | South       | West Coast  | Southeast   |
| County population (N)                                    | 18,230      | 413,210     | 1,552,058   | 974,996     |
| Race/Ethnicity (% of county)                             |             |             |             |             |
| White                                                    | 93.4        | 59.2        | 63          | 82.6        |
| Black                                                    | 1.8         | 36.1        | 10.9        | 11.1        |
| Asian                                                    | 3.4         | 2.1         | 16.2        | 3.6         |
| Other                                                    | 1.4         | 2.6         | 9.2         | 2.7         |
| Median house income                                      | \$57,183.00 | \$45,166.00 | \$63,902.00 | \$51,454.00 |
| Percentage of population that graduated from high school | 90.7        | 86.2        | 87.4        | 91.1        |
| Percentage of population over 65                         | 21          | 16.2        | 14.1        | 24.8        |
| Percentage of persons with a disability                  | 9.8         | 9.7         | 8.2         | 9.9         |
| Percentage of person in poverty <sup>†</sup>             | 10.1        | 20.8        | 14.35       | 11.7        |

Note: \*Hospital performance category 30-day readmission performance category = Defined using a previously published sample of US Veterans Affairs patients<sup>8</sup>; † Note: Definition of poverty varies by state. Data source: <https://www.census.gov/programs-surveys/acs>

Table C3. Skilled Nursing Facility (SNF) characteristics and Medicare Nursing Home Compare ratings

| SNF Contextual Factor                                                                                                                      | SNF A            | SNF B            | SNF C1               | SNF C2                       | SNF D                        |
|--------------------------------------------------------------------------------------------------------------------------------------------|------------------|------------------|----------------------|------------------------------|------------------------------|
| Hospital performance category*                                                                                                             | Low              | Low              | High                 | High                         | High                         |
| Ownership                                                                                                                                  | For-profit       | For-profit       | For-profit           | For-profit                   | Non-profit                   |
| Number of beds                                                                                                                             | 172              | 174              | 59                   | 177                          | 120                          |
| Hospital preferred SNF                                                                                                                     | Yes              | No               | Yes                  | No                           | No                           |
| Hospital-SNF boundary spanning staff <sup>§</sup>                                                                                          | Yes              | No               | Yes                  | No (SNF liaison at hospital) | No (SNF liaison at hospital) |
| Overall star-rating <sup>‡</sup>                                                                                                           | 3                | 4                | 5                    | 3                            | 2                            |
| Overall quality star-rating <sup>‡</sup>                                                                                                   | 5                | 4                | 5                    | 4                            | 5                            |
| Inspection star-rating <sup>‡</sup>                                                                                                        | 2                | 4                | 4                    | 2                            | 2                            |
| Staff star-rating <sup>‡</sup>                                                                                                             | 2                | 4                | 5                    | 4                            | 1                            |
| Short-term quality of care star-rating <sup>‡</sup>                                                                                        | 4                | 3                | 5                    | 3                            | 5                            |
| Long-term quality of resident care star-rating <sup>‡</sup>                                                                                | 3                | 4                | 5                    | 5                            | 5                            |
| Percentage of short-stay residents who were re-hospitalized after a nursing home admission <sup>‡</sup>                                    | 22               | 21.8             | 18.7                 | 16.6                         | 22.2                         |
| Percentage of short-stay residents who have had an outpatient emergency department visit <sup>‡</sup>                                      | 12               | 5.6              | 9.2                  | 10.2                         | 5.4                          |
| Percentage of short-stay residents who improved in their ability to move around on their own <sup>‡</sup>                                  | 58.1             | 72.5             | 71.8                 | 60                           | 57.9                         |
| Rate of successful return to home and community from a SNF compared to national average (7.3%) <sup>‡</sup>                                | Same as national | Same as national | Better than national | Worse than national          | Better than national         |
| Rate of potentially preventable hospital readmissions 30 days after discharge from a SNF compared to national average (49.2%) <sup>‡</sup> | Same as national | Same as national | Same as national     | Same as national             | Worse than national          |

Note: \*Hospital performance category 30-day readmission performance category = Defined using a previously published sample of US Veterans Affairs patients<sup>§</sup>; † Preferred SNF = A SNF that the hospital concentrates on sending patient referrals to for post-acute care; §Hospital-SNF boundary spanning staff are employees that are hired to work in both the hospital and SNF. ‡ Data identified from 2018 Medicare [Nursing Home Compare](#) data.<sup>28</sup>
